# Supplementary material for: Photocatalytic degradation of ibuprofen using titanium oxide: insights into the mechanism and preferential attack of radicals
Source: Royal Society of Chemistry journal article supplement (doi:10.1039/d1ra04340d), 2021-01-01
Supplement: d1ra04340d1.pdf [file d1ra04340d1.pdf]

## Supplementary material

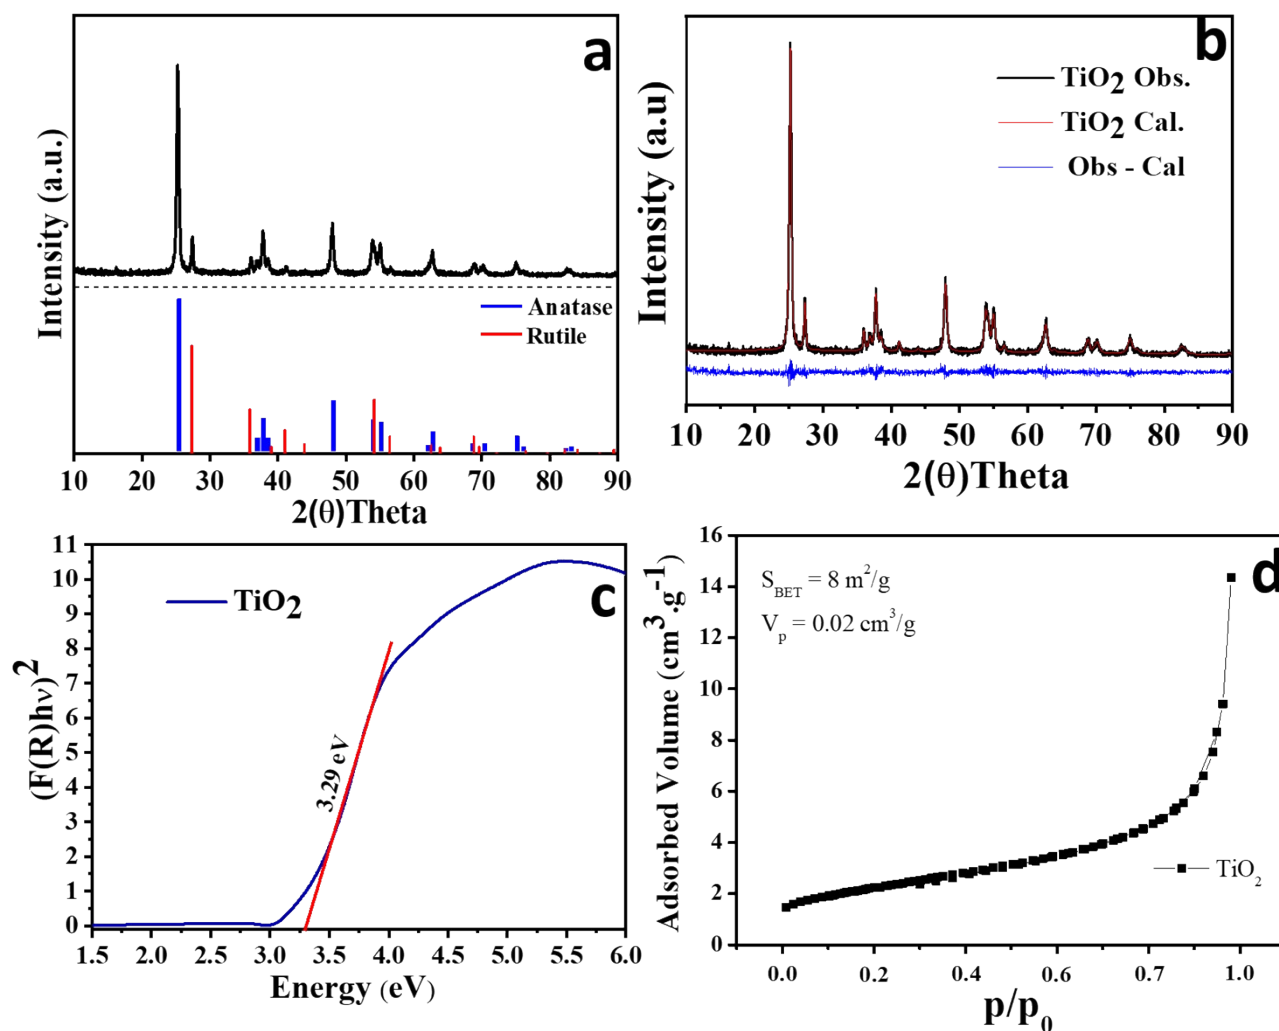

**Figure S1.** (a) X-Ray Diffractogram for titanium dioxide sample; (b) Rietveld refinement for TiO<sub>2</sub> diffractogram; (c) Band-gap energy for indirect allowed transitions; (d) N<sub>2</sub> adsorption-desorption isotherm of the TiO<sub>2</sub> photocatalyst.

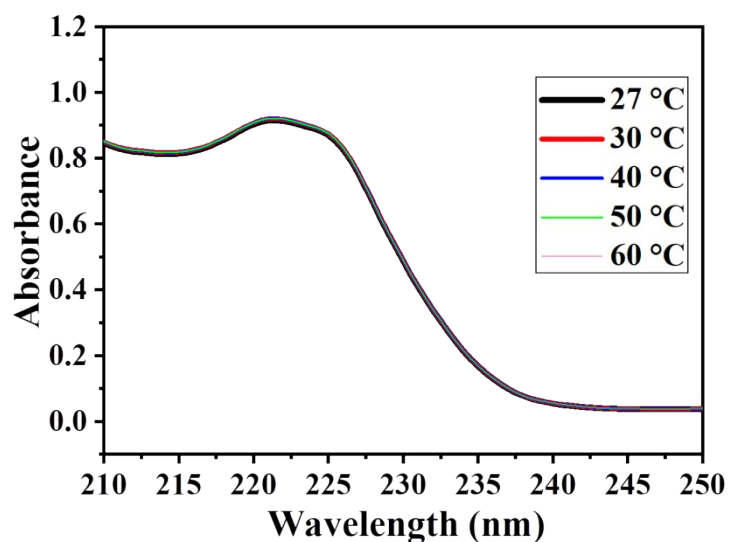

**Figure S2.** Ibuprofen thermal stability analysis in different temperatures.

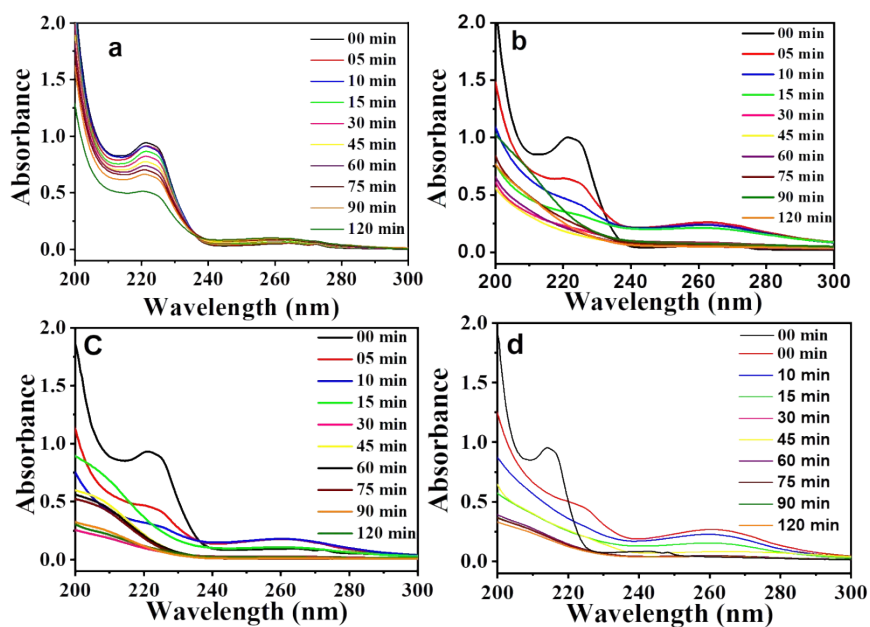

**Figure S3.** (a) Ibuprofen photolysis; (b) Photodegradation of ibuprofen using 0.01g of  $\text{TiO}_2$ ; (c) using 0.03g of  $\text{TiO}_2$ ; (d) using 0.05g of  $\text{TiO}_2$ .

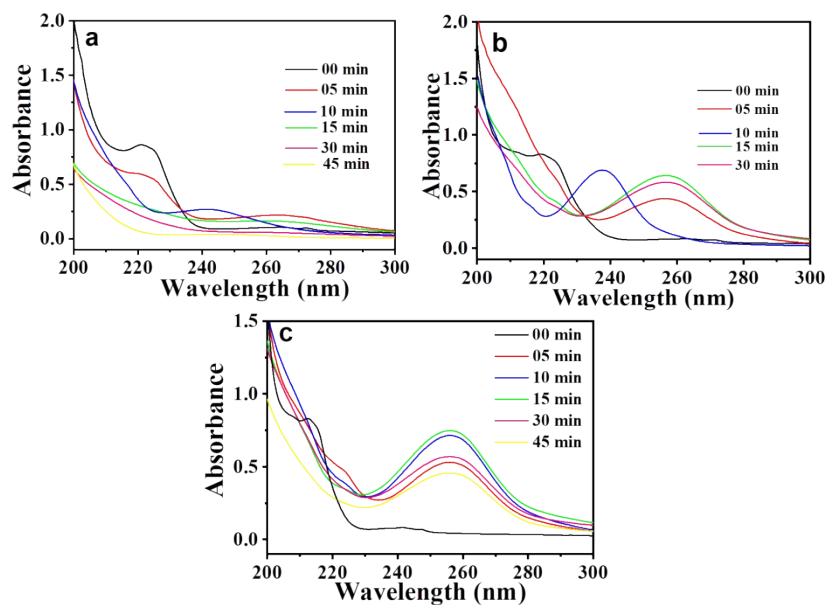

**Figure S4.** Ibuprofen photodegradation: (a) at pH 9.0; (b) at pH 5.0; (c) at pH 3.0.

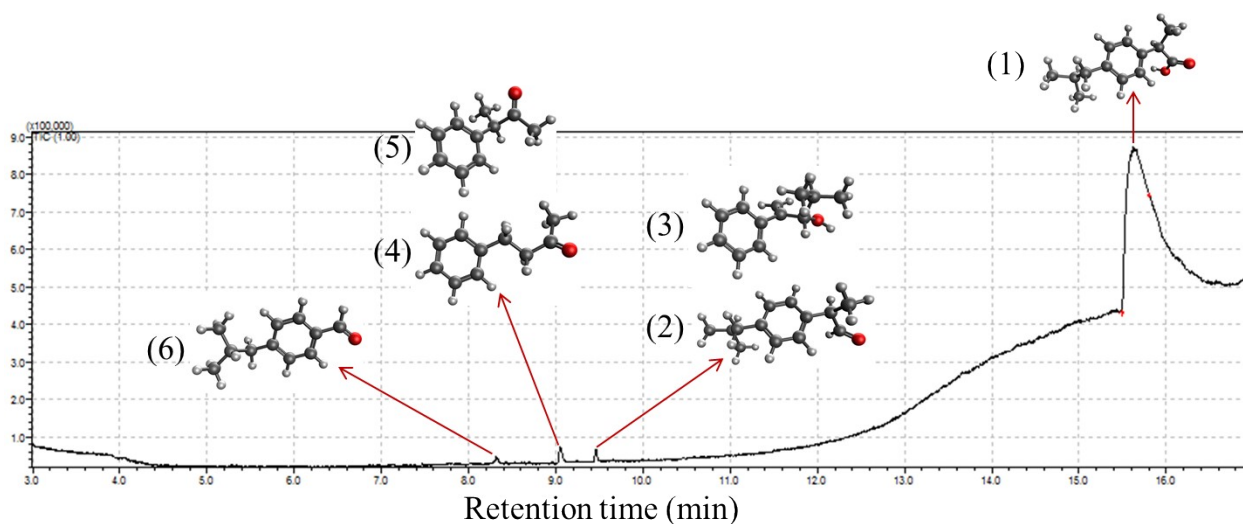

**Figure S5.** Chromatogram identifying the main by-products and intermediates of the reaction, where ibuprofen (1), 4-isobutylacetophenone (2), 4-methyl-2-phenyl-1-penten-3-ol (3), 4-phenyl-benzylacetone (4), 3-phenyl-2-butanone (5) and p-isobutylbenzaldehyde (6).

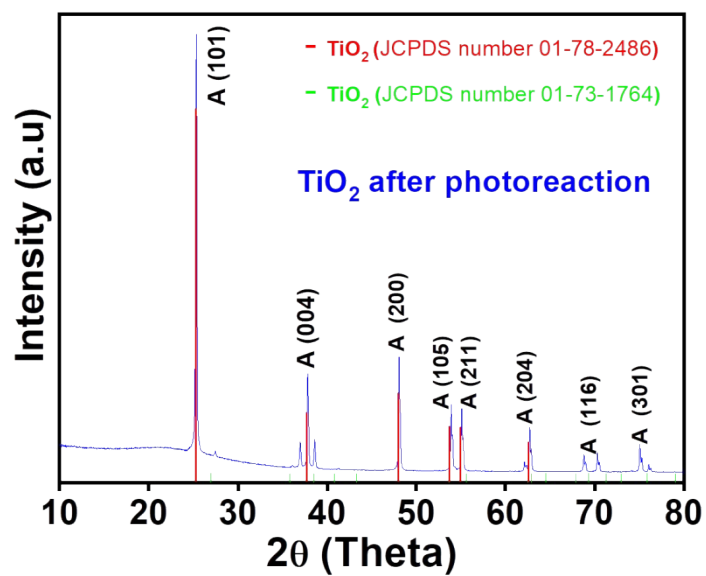

**Figure S6.** XRD result for the  $\text{TiO}_2$  solid after photocatalytic test.

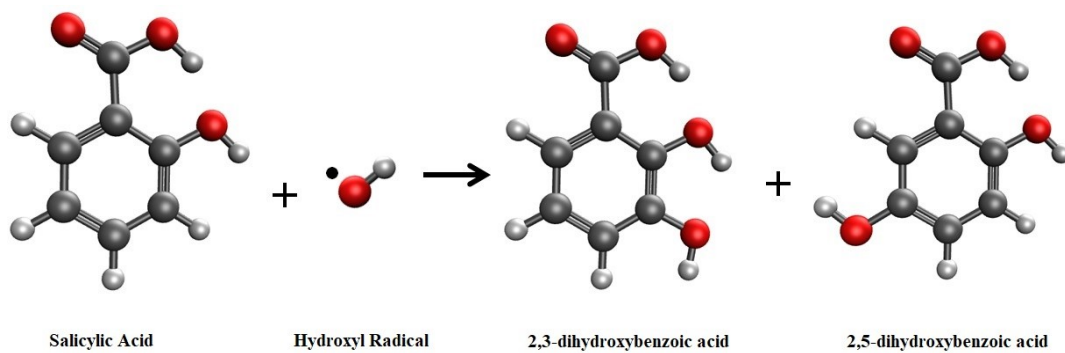

**Figure S7.** Products from the reaction between salicylic acid and hydroxyl radical.

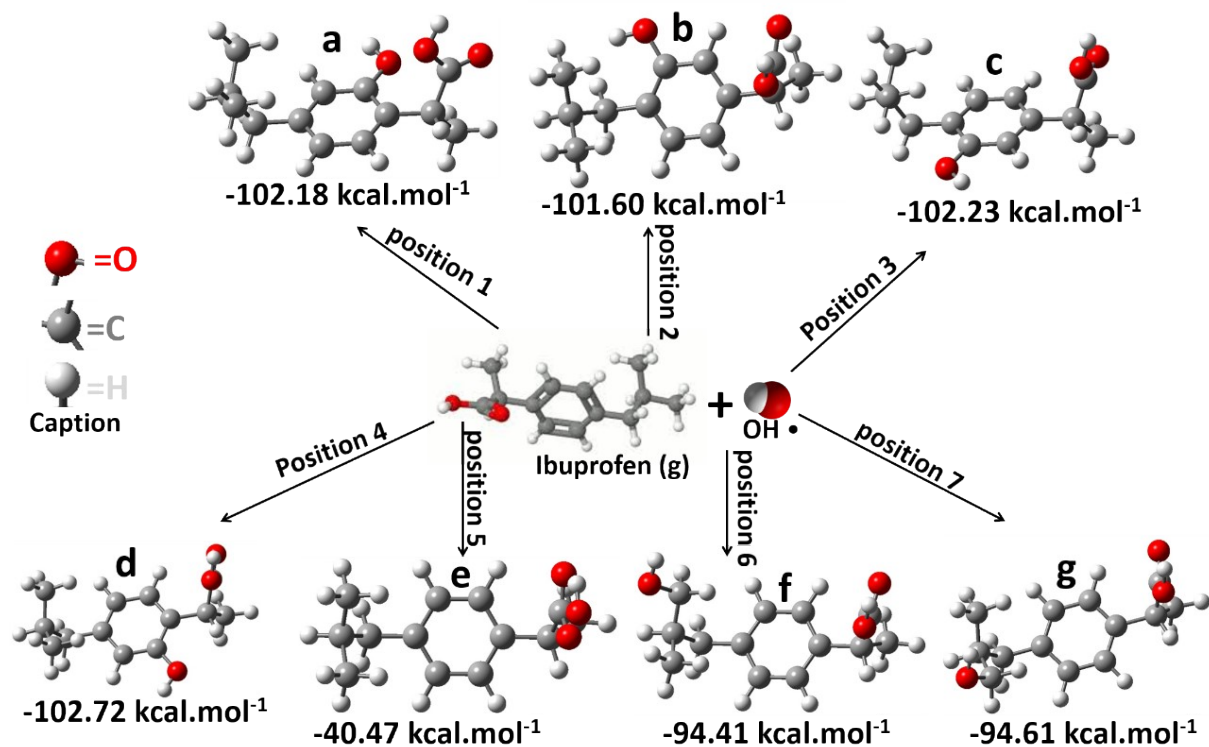

**Figure S8.** Schematic representation of ibuprofen/ $\bullet\text{OH}$  radical system taking into account the presence of water after optimization used to calculate free energy for the seven different positions.

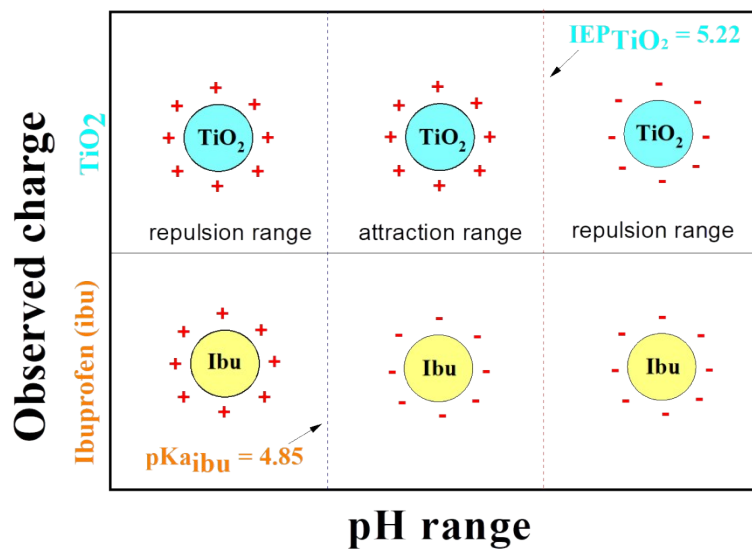

**Scheme S1.** Representation of the interaction between  $\text{TiO}_2$  and ibuprofen charges, depending on the pH range.

**Table S1.** Kinetic parameters obtained for different TiO<sub>2</sub> mass.

| TiO <sub>2</sub> mass (g) | R <sup>2</sup> | k' (min <sup>-1</sup> ) | T <sub>1/2</sub> (min) |
|---------------------------|----------------|-------------------------|------------------------|
| 00.1                      | 0.9964         | 0.0318                  | 21.7970                |
| 0.03                      | 0.9708         | 0.1193                  | 5.8101                 |

**Table S2.** Kinetic parameters obtained for different pHs of ibuprofen solution.

| pH  | R <sup>2</sup> | k' (min <sup>-1</sup> ) | T <sub>1/2</sub> (min) |
|-----|----------------|-------------------------|------------------------|
| 3.0 | 0.9030         | 0.0768                  | 9.0253                 |
| 7.0 | 0.9708         | 0.1193                  | 5.8101                 |

**Table S3.** Comparison of ibuprofen degradation between different studies using TiO<sub>2</sub> catalysts.

| <b>Ibuprofen degradation</b>        |                  |            |                 |           |
|-------------------------------------|------------------|------------|-----------------|-----------|
| Concentration (mg.L <sup>-1</sup> ) | Catalyst         | Time (min) | Performance (%) | Reference |
| 100                                 | TiO <sub>2</sub> | 90         | 99.99           | 1         |
| 0.05                                | TiO <sub>2</sub> | 240        | 100             | 2         |
| 0.1                                 | TiO <sub>2</sub> | 45         | 100             | 3         |
| 20                                  | TiO <sub>2</sub> | 300        | 100             | 4         |
| 213                                 | TiO <sub>2</sub> | 240        | 100             | 5         |
| 15                                  | TiO <sub>2</sub> | 60         | 100             | 6         |
| 20                                  | TiO <sub>2</sub> | 30         | 100             | 7         |
| 20                                  | TiO <sub>2</sub> | 15         | 100             | this work |
